# Supplementary material
Source: publisher figshare collection journal article supplement (https://plos.figshare.com/articles/dataset/_/5428315)
Supplement: Supplementary file [file 1]

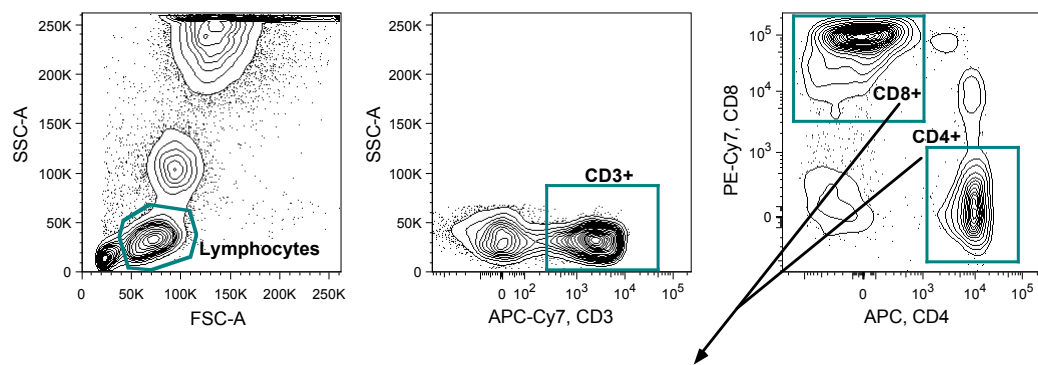

(A) Activation

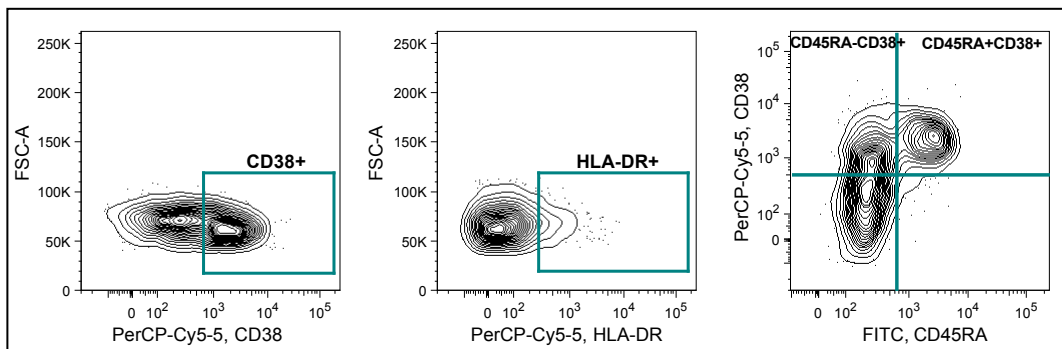

(B) T-cell production and destruction

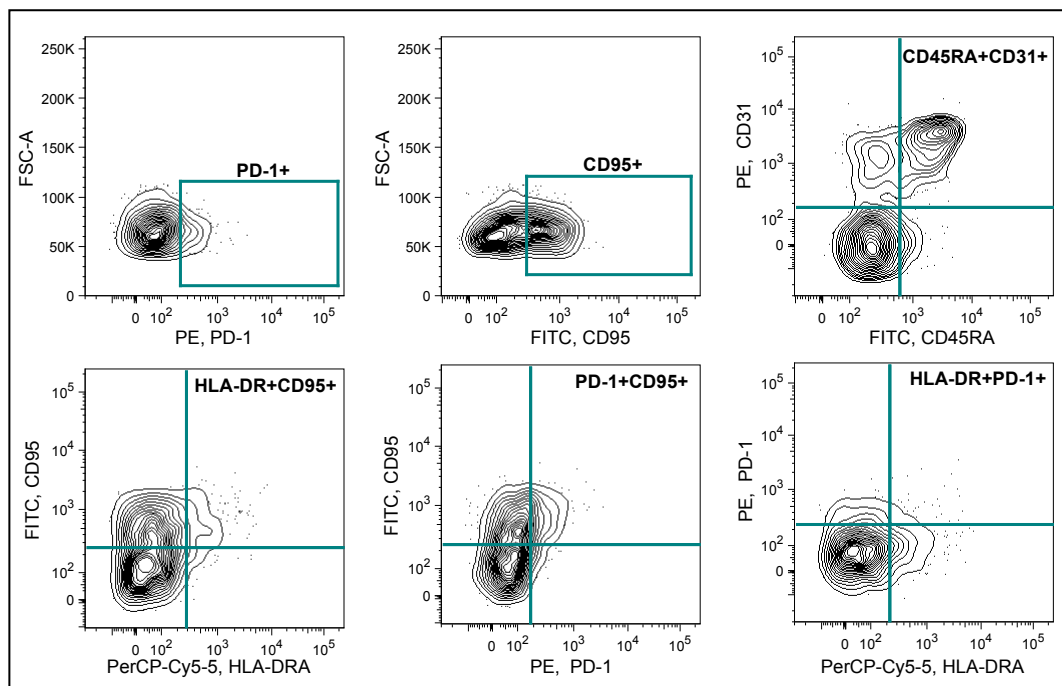

S1 Fig
