# Supplementary material
Source: publisher figshare collection journal article supplement (https://plos.figshare.com/articles/dataset/_/5428315)

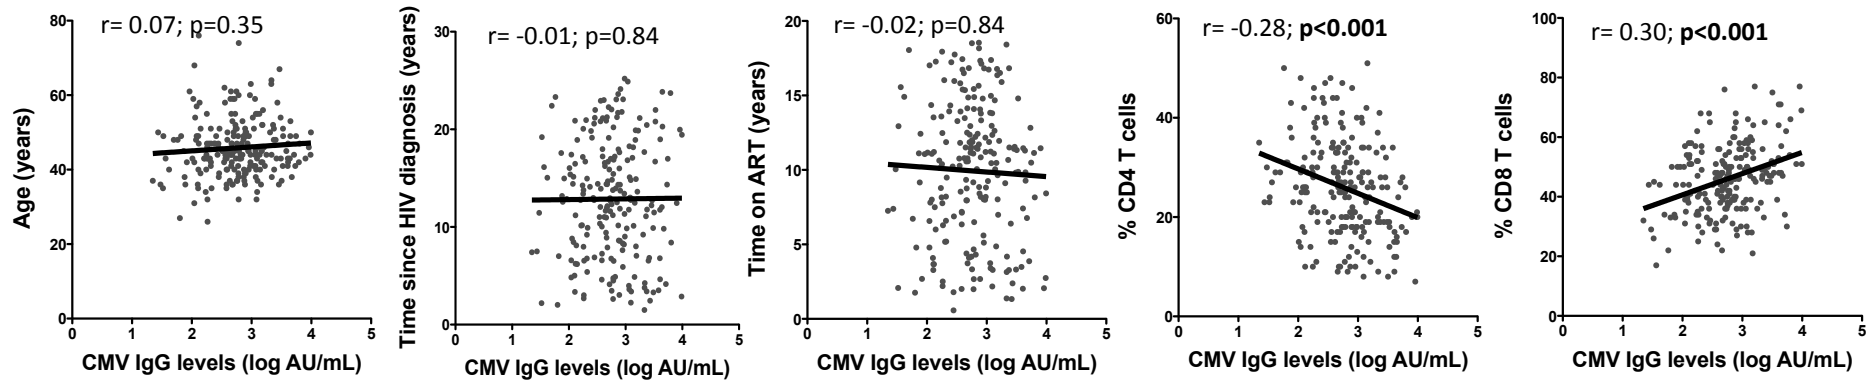

### Activation

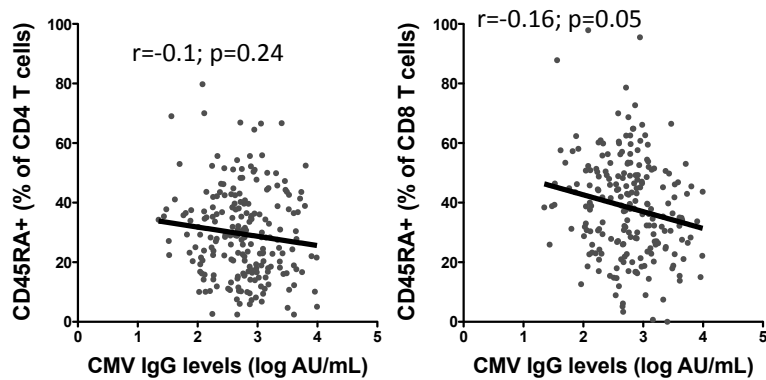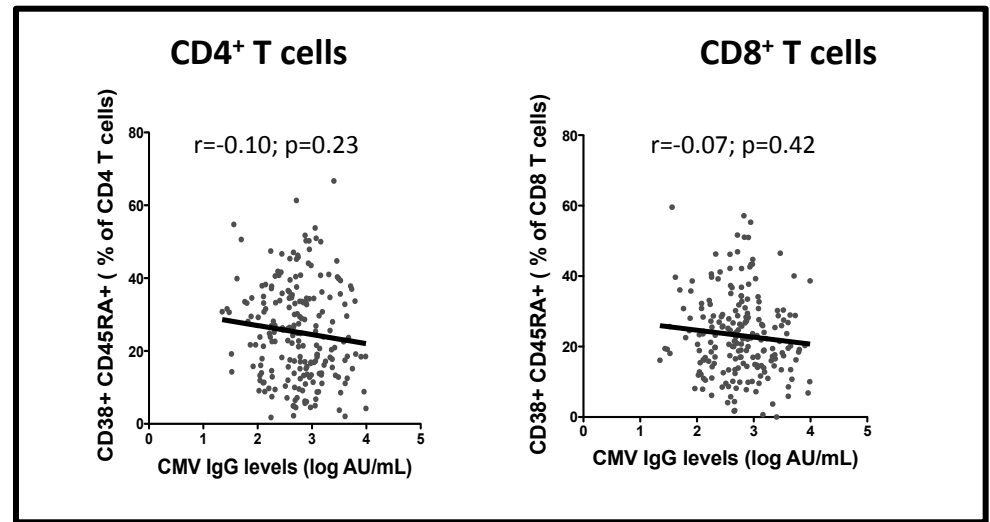

## T-Cell Production and Destruction. CD4<sup>+</sup> T-cells

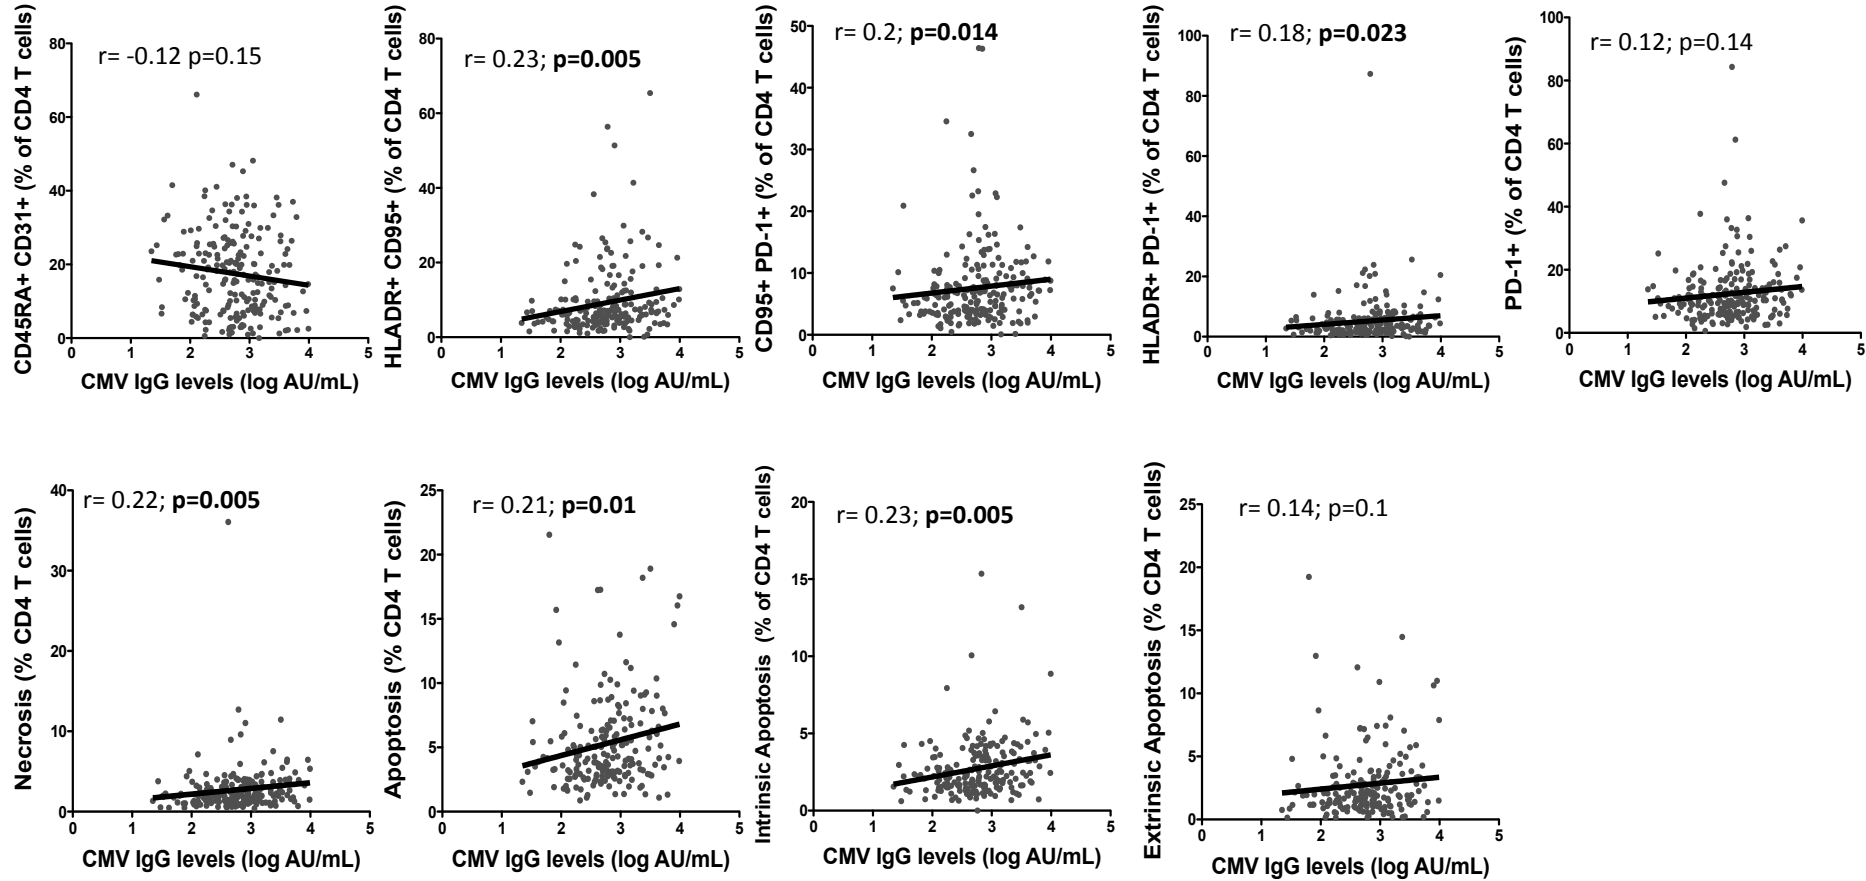

## T-Cell Production and Destruction. CD8<sup>+</sup> T-cells

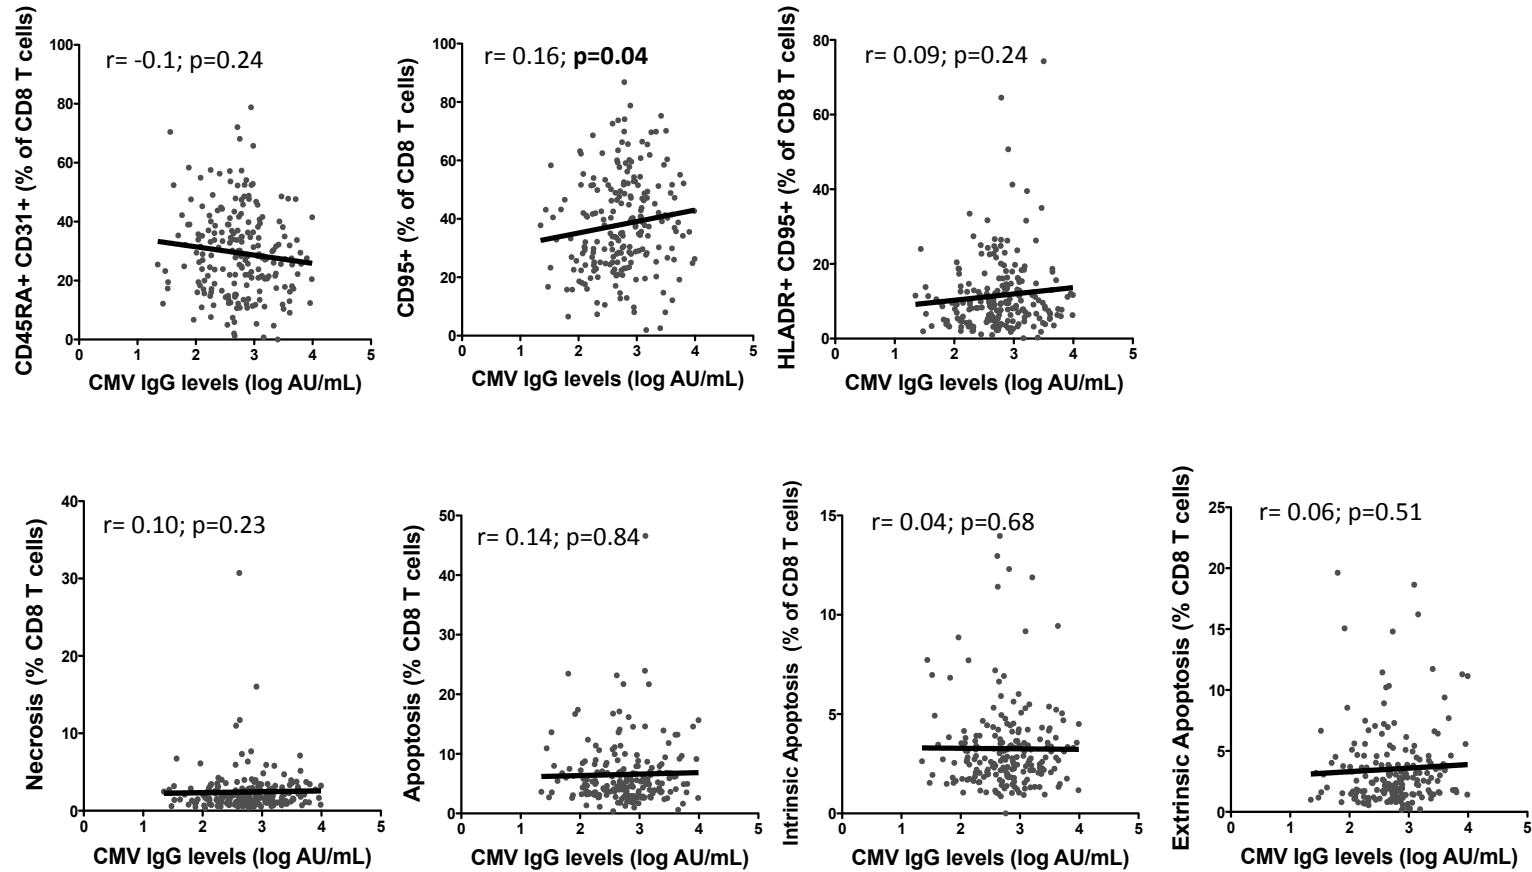

Supplement: Supplementary file [file 1]
